# Supplementary material
Source: PubMed Central journal article supplement (PMC2587586)
Supplement: 0807185105_0807185105SI.pdf [file 0807185105_0807185105SI.pdf]

# Supporting Information

Terness *et al.* 10.1073/pnas.0807185105

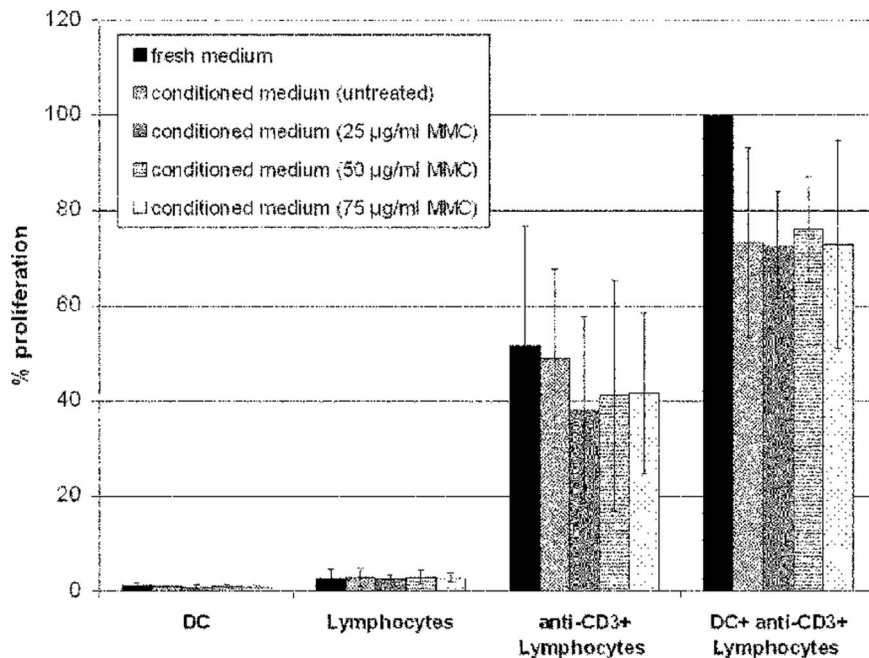

**Fig. S1.** Influence of MMC-DCs culture medium on stimulated T cells. MMC-treated (25–75 µg/ml) or untreated DCs were cultivated for 72 h. Supernatants (conditioned medium) were collected and used for cultures of anti-CD3 antibody-stimulated T cells ( $2 \times 10^5$  per well; 4 days), with or without autologous DCs. Controls consisted of DCs and lymphocytes only. Data represent mean  $\pm$  SD and are expressed as percentage of positive control values (DC+anti-CD3+lymphocytes = 100%) (conditioned medium MMC versus conditioned medium untreated,  $P > 0.05$ ) ( $n = 4$ ).

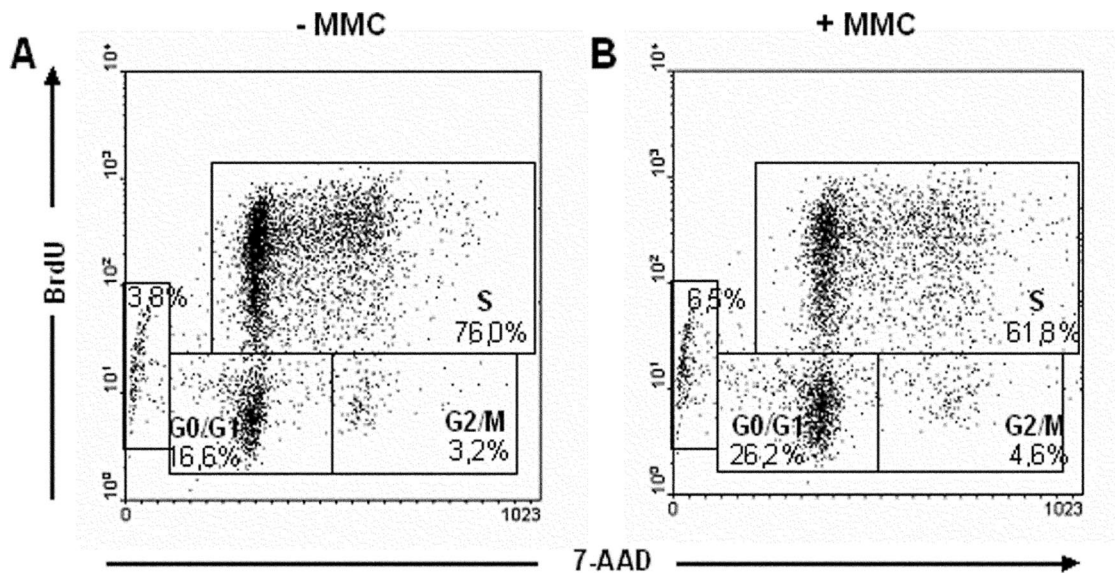

**Fig. S2.** Cell cycle analysis of T cells exposed to MMC-DCs. Anti-CD3 antibody-stimulated T cells were cocultured with (A) untreated and (B) MMC-treated (25  $\mu$ g MMC/ml) autologous DCs for 2 days. Twenty-four hours after supplementation with 10  $\mu$ M BrdU, the cells were analyzed by flow cytometry using a BrdU-Flow-Kit (BD PharMingen). The displayed quadrants show the percentage of cells in the corresponding cell cycle (G<sub>0</sub>/G<sub>1</sub>, G<sub>2</sub>/M, S) as well as that of dead cells.

**Table S1. Gene expression of MMC-treated DCs measured by affymetrix microarray**

| Down-regulated Genes        | Acc. No.    | Symbol        | Gene                                                                                               | Function                                                                                          | Fold change              | P-Value                  |
|-----------------------------|-------------|---------------|----------------------------------------------------------------------------------------------------|---------------------------------------------------------------------------------------------------|--------------------------|--------------------------|
| <b>Development</b>          | NM_000127   | EXT1          | exostoses (multiple) 1                                                                             | skeletal development, glycosaminoglycan biosynthesis, cell cycle                                  | 5.28                     | <10 <sup>-8</sup>        |
|                             | NM_032242   | PLXNA1        | plexin A1                                                                                          | development                                                                                       | 1.32                     | 39.09 x 10 <sup>-8</sup> |
|                             | M64445      | CSF2RA        | colony stimulating factor 2 receptor, $\alpha$ , low-affinity (granulocyte-macrophage)             | proliferation, differentiation and functional activation of hematopoietic stem cells              | 2.83                     | <10 <sup>-8</sup>        |
|                             | NM_030775   | WNT5B         | wingless-type MMTV integration site family, member 5B                                              | development, frizzled-2 and Wnt receptor signaling pathway                                        | 3.03                     | 0.01 x 10 <sup>-8</sup>  |
| <b>Apoptosis</b>            | NM_006457   | PDLIM5        | PDZ and LIM domain 5                                                                               | organ development, cell lineage specification                                                     | 2.30                     | 1.84 x 10 <sup>-8</sup>  |
|                             | NM_003879   | <b>CFLAR</b>  | CASP8 and FADD-like apoptosis regulator (coding for cFLIP)                                         | anti-apoptosis, induction of apoptosis by extracellular signals                                   | 2.00                     | <10 <sup>-8</sup>        |
|                             | *AF01545    |               |                                                                                                    | 2.00                                                                                              | <10 <sup>-8</sup>        |                          |
|                             | *AF041461   |               |                                                                                                    | 2.00                                                                                              | 0.47 x 10 <sup>-8</sup>  |                          |
|                             | *AF009619   |               |                                                                                                    | 1.74                                                                                              | 71.51 x 10 <sup>-8</sup> |                          |
| NM_013982                   | <b>NRG2</b> | neuregulin 2  | anti-apoptosis, signal transduction, cell-cell signaling, embryonic development                    | 5.66                                                                                              | <10 <sup>-8</sup>        |                          |
| <b>Metabolism</b>           | NM_001329   | CTBP2         | C-terminal binding protein 2                                                                       | L-serine biosynthesis, metabolism, negative regulation of cell proliferation                      | 4.29                     | 2.50 x 10 <sup>-8</sup>  |
|                             | *AF222711   |               |                                                                                                    |                                                                                                   | 4.59                     | 0.75 x 10 <sup>-8</sup>  |
|                             | *BC002486   |               |                                                                                                    |                                                                                                   | 3.25                     | 0.1 x 10 <sup>-8</sup>   |
|                             | NM_024830   | AYTL2         | acyltransferase like 2                                                                             | metabolism                                                                                        | 3.48                     | <10 <sup>-8</sup>        |
|                             | NM_022172   | PC            | pyruvate carboxylase                                                                               | gluconeogenesis, metabolism, lipid biosynthesis                                                   | 3.48                     | 1.23 x 10 <sup>-8</sup>  |
|                             | NM_000167   | GK            | glycerol kinase                                                                                    | Carbohydrate-, glycerol-3-phosphate-, glycerol-metabolism                                         | 3.25                     | <10 <sup>-8</sup>        |
|                             | M55575      | BCKDHB        | branched chain keto acid dehydrogenase E1, $\beta$ polypeptide                                     | branched chain family amino acid catabolism                                                       | 6.50                     | 0.15 x 10 <sup>-8</sup>  |
| <b>Protein Modification</b> | NM_017792   | <b>MAP4K4</b> | mitogen-activated protein kinase kinase kinase 4                                                   | protein amino acid phosphorylation, response to stress                                            | 5.66                     | 6.24 x 10 <sup>-8</sup>  |
|                             | NM_003033   | ST3GAL1       | ST3 $\beta$ -galactoside $\alpha$ -2,3-sialyltransferase 1                                         | protein amino acid glycosylation, protein modification                                            | 4.00                     | 0.15 x 10 <sup>-8</sup>  |
|                             | NM_000944   | PPP3CA        | protein phosphatase 3 (formerly 2B), catalytic subunit, $\alpha$ isoform (calcineurin A $\alpha$ ) | protein amino acid dephosphorylation                                                              | 2.30                     | 0.64 x 10 <sup>-8</sup>  |
|                             | NM_005160   | ADRBK2        | adrenergic, $\beta$ , receptor kinase 2                                                            | protein amino acid phosphorylation, signal transduction                                           | 2.64                     | 0.08 x 10 <sup>-8</sup>  |
|                             | NM_004834   | MAP4K4        | mitogen-activated protein kinase kinase kinase 4                                                   | protein amino acid phosphorylation, response to stress, promotes migration of cells               | 3.48                     | 2.27 x 10 <sup>-8</sup>  |
|                             | NM_006904   | PRKDC         | protein kinase, DNA-activated, catalytic polypeptide                                               | double-strand break repair, DNA recombination, protein modification                               | 4.29                     | 16.95 x 10 <sup>-8</sup> |
|                             | NM_004667   | HERC2         | hect domain and RLD 2                                                                              | ubiquitin cycle, intracellular protein transport, protein modification                            | 6.50                     | 0.33 x 10 <sup>-8</sup>  |
|                             | AB034951    | HSPA8         | heat shock 70kDa protein 8                                                                         | protein folding, response to unfolded protein                                                     | 1.74                     | <10 <sup>-8</sup>        |
|                             | AF135794    | AKT3          | v-akt murine thymoma viral oncogene homolog 3 (protein kinase B, $\gamma$ )                        | protein amino acid phosphorylation, signal transduction                                           | 10.56                    | 48.70 x 10 <sup>-8</sup> |
|                             | NM_006904   | PRKDC         | protein kinase, DNA-activated, catalytic polypeptide                                               | double-strand break repair via nonhomologous end joining, DNA recombination, protein modification | 4.29                     | <10 <sup>-8</sup>        |
|                             | NM_024064   | PRKCH         | protein kinase C, $\epsilon$                                                                       | protein amino acid phosphorylation, intracellular signaling cascade                               | 3.48                     | 28.73 x 10 <sup>-8</sup> |

| Down-regulated Genes |                     |           |                                                                   |                                                                                                               |                                                                                |                          |
|----------------------|---------------------|-----------|-------------------------------------------------------------------|---------------------------------------------------------------------------------------------------------------|--------------------------------------------------------------------------------|--------------------------|
| Genes                | Acc. No.            | Symbol    | Gene                                                              | Function                                                                                                      | Fold change                                                                    | P-Value                  |
| Transport            | NM_014683           | ULK2      | unc-51-like kinase 2 (C. elegans)                                 | protein amino acid phosphorylation                                                                            | 2.14                                                                           | 46.71 x 10 <sup>-8</sup> |
|                      | NM_021945           | C6orf85   | chromosome 6 open reading frame 85                                | transport                                                                                                     | 5.66                                                                           | 20.38 x 10 <sup>-8</sup> |
|                      | NM_004853           | STX8      | syntaxin 8                                                        | transport                                                                                                     | 4.59                                                                           | 5.1 x 10 <sup>-8</sup>   |
|                      | NM_006348           | COG5      | component of oligomeric golgi complex 5                           | intra-Golgi vesicle-mediated and protein transport                                                            | 3.48                                                                           | 4.60 x 10 <sup>-8</sup>  |
|                      | NM_018264           | TYW1      | tRNA-yW synthesizing protein 1 homolog (S. cerevisiae)            | electron transport                                                                                            | 3.25                                                                           | 19.96 x 10 <sup>-8</sup> |
|                      | NM_018303           | EXOC2     | exocyst complex component 2                                       | exocytosis, protein transport                                                                                 | 2.64                                                                           | <10 <sup>-8</sup>        |
|                      | NM_004565           | PEX14     | peroxisomal biogenesis factor 14                                  | protein targeting and transport                                                                               | 2.46                                                                           | 16.51 x 10 <sup>-8</sup> |
|                      | NM_014251           | SLC25A13  | solute carrier family 25, member 13 (citric)                      | transport                                                                                                     | 2.83                                                                           | 0.6 x 10 <sup>-8</sup>   |
|                      | NM_020674           | CYP20A1   | cytochrome P450, family 20, subfamily A, polypeptide 1            | electron transport                                                                                            | 2.46                                                                           | 0.93 x 10 <sup>-8</sup>  |
|                      | Signal Transduction | NM_005369 | MCF2                                                              | MCF.2 cell line derived transforming sequence                                                                 | intracellular signaling cascade, regulation of Rho protein signal transduction | 27.86                    |
| NM_019011            |                     | TRIAD3    | TRIAD3 protein                                                    | ubiquitin cycle, apoptosis, ATP synthesis coupled proton transport                                            | 2.00                                                                           | 4.06 x 10 <sup>-8</sup>  |
| NM_012296            |                     | GAB2      | GRB2-associated binding protein 2                                 | signaling to antigen, cytokines and growth factor receptor                                                    | 3.73                                                                           | <10 <sup>-8</sup>        |
| NM_002221            |                     | ITPKB     | inositol 1,4,5-trisphosphate 3-kinase B                           | signal transduction                                                                                           | 8.57                                                                           | 1.61 x 10 <sup>-8</sup>  |
| NM_004145            |                     | MYO9B     | myosin IXB                                                        | intracellular signaling cascade, actin filament-based movement, signal transduction                           | 2.30                                                                           | 0.01 x 10 <sup>-8</sup>  |
| Transcription        | NM_015061           | JMJD2C    | jumonji domain containing 2C                                      | regulation of transcription, DNA-dependent                                                                    | 6.06                                                                           | 0.07 x 10 <sup>-8</sup>  |
|                      | NM_004269           | CRSP8     | cofactor for Sp1 transcriptional activation, subunit 8, 34kDa     | transcription, regulation of transcription, DNA-dependent                                                     | 2.64                                                                           | 8.58 x 10 <sup>-8</sup>  |
| Unknown              | NM_000332           | ATXN1     | ataxin 1                                                          | -                                                                                                             | 6.06                                                                           | 5.59 x 10 <sup>-8</sup>  |
|                      | NM_013275           | ANKRD11   | ankyrin repeat domain 11                                          | -                                                                                                             | 3.48                                                                           | 0.01 x 10 <sup>-8</sup>  |
|                      | NM_015556           | SIPA1L1   | Signal-induced proliferation-associated 1 like 1                  | -                                                                                                             | 4.59                                                                           | 20.89 x 10 <sup>-8</sup> |
|                      | NM_002149           | HPCAL1    | hippocalcin-like 1                                                | -                                                                                                             | 3.73                                                                           | 0.10 x 10 <sup>-8</sup>  |
|                      | NM_016196           | RBM19     | RNA binding motif protein 19                                      | -                                                                                                             | 2.83                                                                           | 1.02 x 10 <sup>-8</sup>  |
|                      | NM_017794           | KIAA1797  | KIAA1797                                                          | -                                                                                                             | 6.50                                                                           | 3.39 x 10 <sup>-8</sup>  |
|                      | NM_005758           | HNRPA3P1  | heterogeneous nuclear ribonucleoprotein A3 pseudogene 1           | -                                                                                                             | 6.06                                                                           | 9.22 x 10 <sup>-8</sup>  |
|                      | NM_032340           | C6orf125  | chromosome 6 open reading frame 125                               | -                                                                                                             | 2.46                                                                           | 47.08 x 10 <sup>-8</sup> |
| Upregulated Genes    |                     |           |                                                                   |                                                                                                               |                                                                                |                          |
| Genes                | Acc. No.            | Symbol    | Gene                                                              | Function                                                                                                      | Fold change                                                                    | P-Value                  |
| Development          | NM_005461           | MAFB      | v-maf musculoaponeurotic fibro-sarcoma oncogene homolog B (avian) | transcription, regulation of transcription, DNA-dependent, sensory organ development                          | 11.31                                                                          | <10 <sup>-8</sup>        |
|                      | NM_016399           | TRIAP1    | TP53 regulated inhibitor of apoptosis 1                           | anti-apoptosis, DNA damage response, signal transduction by p53 class mediator resulting in cell cycle arrest | 4.00                                                                           | 5.03 x 10 <sup>-8</sup>  |
| Apoptosis            | NM_003914           | CCNA1     | cyclin A1                                                         | apoptosis, regulation of cyclin dependent protein kinase activity, cell cycle, mitosis                        | 3.48                                                                           | 0.46 x 10 <sup>-8</sup>  |
|                      | NM_004295           | TRAF4     | TNF receptor-associated factor 4                                  | signal transduction, development, apoptosis regulation                                                        | 2.83                                                                           | 23.08 x 10 <sup>-8</sup> |
|                      | NM_022121           | PERP      | PERP, TP53 apoptosis effector                                     | apoptosis, cell adhesion, protein binding                                                                     | 1.87                                                                           | 32.76 x 10 <sup>-8</sup> |
|                      |                     |           |                                                                   |                                                                                                               |                                                                                |                          |

| Upregulated Genes           | Acc. No.               | Symbol        | Gene                                                                                          | Function                                                                                    | Fold change    | P-Value                                         |
|-----------------------------|------------------------|---------------|-----------------------------------------------------------------------------------------------|---------------------------------------------------------------------------------------------|----------------|-------------------------------------------------|
|                             | NM_018494<br>*AF274972 | LRDD          | leucine-rich repeats and death domain containing (coding for PIDD)                            | signal transduction, apoptosis                                                              | 2.83<br>3.25   | $0.5 \times 10^{-8}$<br>$0.5 \times 10^{-8}$    |
|                             | NM_004083              | DDIT3         | DNA-damage-inducible transcript 3                                                             | regulation of progression through cell cycle, transcription, regulation of transcription    | 4.00           | $28.1 \times 10^{-8}$                           |
|                             | NM_004110              | FDXR          | ferredoxin reductase                                                                          | electron transport, lipid metabolism, steroid biosynthesis                                  | 8.57           | $<10^{-8}$                                      |
|                             | NM_003842              | TNFRSF<br>10B | tumor necrosis factor receptor superfamily, member 10b (coding for TRAIL-R2)                  | caspase activation, signal transduction, cell surface receptor linked signal transduction   | 2.00           | $38.12 \times 10^{-8}$                          |
|                             | NM_003841              | TNFRSF<br>10C | tumor necrosis factor receptor superfamily, member 10c, decoy without an intracellular domain | apoptosis, signal transduction                                                              | 16.00          | $50.24 \times 10^{-8}$                          |
| <b>Metabolism</b>           | NM_000067              | CA2           | carbonic anhydrase II                                                                         | one-carbon compound metabolism                                                              | 3.73           | $0.23 \times 10^{-8}$                           |
|                             | NM_016006              | ABHD5         | abhydrolase domain containing 5r                                                              | proteolysis, aromatic compound metabolism                                                   | 6.96           | $0.01 \times 10^{-8}$                           |
|                             | NM_000269              | NME1          | non-metastatic cells 1, protein (NM23A)                                                       | GTP-, UTP-, CTP-biosynthesis                                                                | 3.03           | $<10^{-8}$                                      |
|                             | NM_014059              | RGC32         | response gene to complement 32                                                                | regulation of cyclin dependent protein kinase activity                                      | 39.40          | $0.04 \times 10^{-8}$                           |
|                             | NM_031459              | SESN2         | sestrin 2                                                                                     | cell cycle arrest                                                                           | 3.25           | $79.46 \times 10^{-8}$                          |
|                             | NM_002061              | GCLM          | glutamate-cysteine ligase, modifier subunit                                                   | cysteine metabolism, glutathione biosynthesis                                               | 1.74           | $1.96 \times 10^{-8}$                           |
|                             | NM_015423              | AASDH<br>PPT  | aminoadipate-semialdehyde DH-phosphopantetheinyl transferase                                  | fatty acid biosynthesis                                                                     | 1.87           | $12.79 \times 10^{-8}$                          |
|                             | NM_002065              | GLUL          | glutamate-ammonia ligase (glutamine synthetase)                                               | regulation of neurotransmitter levels, glutamine biosynthesis, nitrogen compound metabolism | 2.00           | $0.02 \times 10^{-8}$                           |
|                             | NM_001236              | CBR3          | carbonyl reductase 3                                                                          | metabolism                                                                                  | 2.14           | $9.37 \times 10^{-8}$                           |
|                             | NM_004219              | PTTG1         | pituitary tumor-transforming 1                                                                | DNA metabolism, DNA repair, transcription from RNA polymerase II promoter                   | 2.14           | $39 \times 10^{-8}$                             |
|                             | NM_000270              | NP            | nucleoside phosphorylase                                                                      | nucleotide/nucleic acid metabolism, DNA modification                                        | 1.87           | $46.97 \times 10^{-8}$                          |
|                             | NM_014252              | SLC25A15      | solute carrier family 25 (mitochondrial carrier, ornithine transporter) member 15             | urea cycle, mitochondrial ornithine transport, amino acid metabolism                        | 4.29           | $8.64 \times 10^{-8}$                           |
|                             | NM_017421<br>*AL136726 | COQ3          | coenzyme Q3 homolog, methyltransferase ( <i>S. cerevisiae</i> )                               | ubiquinone biosynthesis                                                                     | 21.11<br>32.00 | $46.11 \times 10^{-8}$<br>$0.03 \times 10^{-8}$ |
|                             | NM_009590              | AOC2          | amine oxidase, copper containing 2 (retina-specific)                                          | catecholamine metabolism, visual perception, biogenic amine metabolism                      | 3.73           | $0.18 \times 10^{-8}$                           |
|                             | AF096304               | TM7SF2        | transmembrane 7 superfamily member 2                                                          | cholesterol-, steroid-, lipid-biosynthesis                                                  | 2.83           | $0.26 \times 10^{-8}$                           |
|                             | NM_001807              | CEL           | carboxyl ester lipase                                                                         | triacylglycerol metabolism, cholesterol catabolism                                          | 2.64           | $0.66 \times 10^{-8}$                           |
|                             | NM_013267              | GLS2          | glutaminase 2 (liver, mitochondrial)                                                          | amino acid metabolism, glutamine metabolism                                                 | 12.13          | $80.74 \times 10^{-8}$                          |
| <b>Protein Modification</b> | NM_031301              | APH1B         | anterior pharynx defective 1 homolog B ( <i>C. elegans</i> )                                  | Notch signaling pathway, protein processing                                                 | 3.74           | $86.16 \times 10^{-8}$                          |
|                             | NM_005729              | PPIF          | peptidylprolyl isomerase F(cyclophilinF)                                                      | protein folding                                                                             | 2.64           | $1.28 \times 10^{-8}$                           |
|                             | NM_019116              | UBPH          | ubiquitin-binding protein homolog                                                             | protein modification                                                                        | 2.39           | $0.53 \times 10^{-8}$                           |

| Upregulated Genes                           | Acc. No.  | Symbol     | Gene                                                                                                       | Function                                                                                              | Fold change | P-Value                  |
|---------------------------------------------|-----------|------------|------------------------------------------------------------------------------------------------------------|-------------------------------------------------------------------------------------------------------|-------------|--------------------------|
|                                             | NM_006389 | HYOU1      | hypoxia up-regulated 1                                                                                     | protein folding, response to stress, glycolysis                                                       | 1.32        | 45.64 x 10 <sup>-8</sup> |
|                                             | NM_013336 | SEC61A1    | Sec61 $\alpha$ 1 subunit ( <i>S. cerevisiae</i> )                                                          | protein targeting, secretion, transport                                                               | 1.52        | 0.73 x 10 <sup>-8</sup>  |
|                                             | BC001134  | FTS        | fused toes homolog (mouse)                                                                                 | ubiquitin cycle, protein modification, apoptosis                                                      | 1.41        | 2.17 x 10 <sup>-8</sup>  |
| <b>Transport</b>                            | NM_016072 | GOLT1B     | golgi transport 1 homolog B ( <i>S. cerevisiae</i> )                                                       | vesicle-mediated transport, positive regulation of I- $\beta$ B kinase/NF- $\kappa$ B cascade         | 1.52        | 3.29 x 10 <sup>-8</sup>  |
|                                             | NM_003764 | STX11      | syntaxin 11                                                                                                | intracellular protein and membrane fusion, transport                                                  | 1.52        | <10 <sup>-8</sup>        |
|                                             | NM_006555 | YKT6       | YKT6 v-SNARE homolog ( <i>S. cerevisiae</i> )                                                              | vesicle targeting and docking during exocytosis, transport                                            | 2.00        | 6.16 x 10 <sup>-8</sup>  |
|                                             | NM_006815 | TMED2      | transmembrane emp24 domain trafficking protein 2                                                           | intracellular protein transport, ER to Golgi vesicle-mediated transport                               | 1.32        | 0.01 x 10 <sup>-8</sup>  |
|                                             | NM_024628 | SLC12A8    | solute carrier family 12 (potassium/ chloride transporters), member 8                                      | amino acid transport                                                                                  | 2.00        | 28.61 x 10 <sup>-8</sup> |
| <b>Signal Transduction</b>                  | NM_001124 | ADM        | adrenomedullin                                                                                             | cAMP and progesterone biosynthesis, signal transduction                                               | 9.85        | 0.04 x 10 <sup>-8</sup>  |
|                                             | U82979    | LILRB4     | leukocyte immunoglobulin-like receptor, subfamily B (with TM and ITIM domains), member 4 (coding for ILT3) | immune response, signal transduction, defense response                                                | 1.62        | 1.35 x 10 <sup>-8</sup>  |
|                                             | NM_007173 | PRSS23     | protease, serine, 23                                                                                       | proteolysis, signal transduction, G-protein coupled receptor protein signaling pathway                | 3.25        | 0.03 x 10 <sup>-8</sup>  |
|                                             | NM_022337 | RAB38      | RAB38, member RAS oncogene family                                                                          | small GTPase mediated signal transduction, protein transport                                          | 3.03        | 41.29 x 10 <sup>-8</sup> |
|                                             | NM_005903 | SMAD5      | SMAD, mothers against DPP homolog 5 ( <i>Drosophila</i> )                                                  | transcription, regulation of transcription, DNA-dependent, signal transduction                        | 6.50        | 0.05 x 10 <sup>-8</sup>  |
|                                             | NM_022036 | GPRC5C     | G protein-coupled receptor, family C, group 5, member C                                                    | signal transduction, G-protein coupled receptor protein signaling pathway, G-protein coupled receptor | 11.31       | 41.52 x 10 <sup>-8</sup> |
| <b>Processing Transcription Replication</b> | NM_006079 | CITED2     | Cbp/p300-interacting transactivator, with Glu/Asp-rich carboxy-terminal domain, 2                          | regulation of transcription from RNA polymerase II promoter                                           | 2.30        | 43.5 x 10 <sup>-8</sup>  |
|                                             | *AF109161 |            |                                                                                                            |                                                                                                       | 2.64        | 0.01 x 10 <sup>-8</sup>  |
|                                             | NM_006502 | POLH       | polymerase (DNA directed), $\epsilon$                                                                      | DNA replication and repair, regulation of DNA repair                                                  | 2.46        | <10 <sup>-8</sup>        |
|                                             | NM_004089 | TSC22D3    | TSC22 domain family, member 3 (coding for GILZ)                                                            | regulation of transcription, DNA-dependent                                                            | 1.87        | 62.57 x 10 <sup>-8</sup> |
|                                             | NM_007362 | NCBP2      | nuclear cap binding protein subunit 2, 20kDa                                                               | mRNA processing, mRNA export from nucleus, snRNA export from nucleus                                  | 1.23        | 51.01 x 10 <sup>-8</sup> |
|                                             | NM_003655 | CBX4       | chromobox homolog 4 (Pc class homolog, <i>Drosophila</i> )                                                 | chromatin assembly or disassembly, transcription, regulation of transcription, DNA-dependent          | 1.87        | 62.11 x 10 <sup>-8</sup> |
|                                             | NM_002632 | PGF        | placental growth factor, vascular endo-thelial growth factor-related protein                               | regulation of progression through cell cycle, angiogenesis, signal transduction                       | 22.63       | 70.73 x 10 <sup>-8</sup> |
| <b>Different Functions</b>                  | NM_003518 | HIST1 H2BG | histone 1, H2bg                                                                                            | nucleosome assembly, chromosome organization and biogenesis (sensu Eukaryota)                         | 3.73        | 0.02 x 10 <sup>-8</sup>  |
|                                             | NM_006449 | CDC42EP3   | CDC42 effector protein (Rho GTPase binding) 3                                                              | regulation of cell shape                                                                              | 32.00       | 30.95 x 10 <sup>-8</sup> |



| Upregulated Genes | Acc. No.  | Symbol  | Gene                                                       | Function                                                                                                            | Fold change | P-Value                |
|-------------------|-----------|---------|------------------------------------------------------------|---------------------------------------------------------------------------------------------------------------------|-------------|------------------------|
|                   | NM_000024 | ADRB2   | adrenergic, $\beta$ -2-, receptor, surface                 | activation of MAPK activity, receptor mediated endocytosis, transmembrane receptor protein tyrosine kinase activity | 4.59        | $0.02 \times 10^{-8}$  |
|                   | NM_024005 | DDX3X   | DEAD (Asp-Glu-Ala-Asp) box polypeptide 3, X-linked         | RNA/DNA/protein binding, ATP binding                                                                                | 4.29        | $<10^{-8}$             |
|                   | NM_007071 | HHLA3   | HERV-H LTR-associating 3                                   | protein binding                                                                                                     | 2.00        | $4.7 \times 10^{-8}$   |
|                   | AL136660  | SPCS3   | signal peptidase complex subunit 3 homolog (S. cerevisiae) | signal peptide processing                                                                                           | 1.32        | $74.04 \times 10^{-8}$ |
|                   | BC002709  | TP53AP1 | TP53 activated protein 1                                   | response to stress and to DNA damage stimulus                                                                       | 4.00        | $0.02 \times 10^{-8}$  |
| <b>Unknown</b>    | NM_013399 | C16orf5 | chromosome 16 open reading frame 5                         | -                                                                                                                   | 1.62        | $4.92 \times 10^{-8}$  |
|                   | NM_018112 | TMEM38B | transmembrane protein 38B                                  | -                                                                                                                   | 1.23        | $87.64 \times 10^{-8}$ |

Variants are labelled with \* and relevant genes are displayed in bold characters. Accession numbers are shown in column 1.
